# 1 Hormones and the Human Alpha Female

2 **Monika K. Sumra\***

3 Department of Anthropology, University of Toronto Scarborough, Toronto, ON, M1C 1A4,  
4 Canada

5 \* [monika@bunkaleadership.com](mailto:monika@bunkaleadership.com)

## 6 **Abstract**

7 The concept of the alpha female has become widely accepted as a form of female identity in the  
8 West. Though relationships between hormone concentrations and alpha-related traits have been  
9 demonstrated in alpha nonhuman primates, this has not been examined in the case of the human  
10 alpha female. The present study examined the associations of testosterone and cortisol, as well as  
11 3 other hormones, estradiol, oxytocin, and progesterone derived from hair samples, with 11  
12 variables related to the expression of the alpha female identity in a small non-random sample  
13 (N=126) of self-identified alpha and non-alpha women in North America. The results revealed  
14 statistically significant differences between these groups. When compared to non-alpha women,  
15 alpha women scored higher than non-alphas in measures for masculinity, leadership, low  
16 introversion, self-esteem, and exhibited lower hair cortisol levels. Alphas exhibited slightly  
17 lower estradiol and oxytocin levels than non-alphas though these differences were non-  
18 significant. Similar non-significant differences were also found in the case of sexual experience,  
19 sexual dominance, testosterone, and progesterone. Though cortisol was not associated with  
20 masculine traits, it was positively and significantly associated with leadership. Cortisol was also  
21 negatively and significantly associated with strength and a measure for femininity. Progesterone,  
22 testosterone, and oxytocin were positively and significantly associated with enjoying sex, as was  
23 oxytocin with playing a dominant role in sexual encounters. Surprisingly, testosterone was not

24 associated with alpha status nor with the measure of masculinity, and estradiol was not  
25 associated with any of the variables. The results imply that women who identify as alpha may  
26 experience less physiological stress than non-alpha females as measured by their lower cortisol  
27 levels.

## 28 **Introduction**

29 The influence of hormones includes “intrinsic feedbacks of social context and social behavior on  
30 hormones” [1-16]. Behavior is driven by internal and external/environmental stimuli which act  
31 on neural systems [16]. The reciprocal relationship between hormones and social behavior  
32 demonstrates that hormones do not determine behavior but may increase or decrease the  
33 probability of the expression of a given behavior [16]. Given that dominance as a behavioral  
34 strategy can be used to gain or maintain high status in society, it is not surprising that a large  
35 body of literature has focused on understanding how biological factors, specifically hormones,  
36 may influence dominance behaviors [8].

37  
38 The cross-disciplinary interest in the relationship between social status and hormones is not new  
39 [14, 17-26]. Previous research has demonstrated that hormones, specifically cortisol,  
40 progesterone, estradiol (primary in women of reproductive age), testosterone, and the peptide  
41 hormone oxytocin, correlate with behavioral traits deemed as “alpha” in women [8, 26-35]. For  
42 example, attributes including self-assertion, confidence, conceit, forcefulness, control, and  
43 willfulness have been associated with higher circulating testosterone levels in women, and lower  
44 levels with absence of these alpha traits [28].

45

46 Along with engaging in aggressive behaviors, alpha female individuals have also been found to  
47 behave in a more cooperative and communal manner [36]. For example, alpha female bonobos  
48 maintain cohesion through affiliation while also engaging in aggressive behaviors to keep males  
49 away from food [37]. Animal studies have revealed that increased levels of oxytocin are  
50 associated with behaviors that promote affiliation, cooperation and prosociality (performing acts  
51 that benefit or help others) with other females [38,39]. Communal behavior or affiliation has also  
52 been shown to be associated with the expression of the alpha female identity [40]. Research in  
53 humans, however, has yet to be conducted. The peptide hormone oxytocin has a special  
54 relevance to female behavior because its effects are strongly modulated by estrogen [41].  
55 Estradiol has been linked to dominance behavior. In one-on-one dominance contests, women  
56 who expressed higher power motivation also had higher circulating estradiol levels both before  
57 and after the contest, compared to women who had lower power motivation [32].

58  
59 When it comes to hormones and alpha status, much of the research within this context has  
60 focused primarily on a specific masculine trait, aggression. For example, Gladue (1991) [42]  
61 found that both testosterone and estradiol, were positively correlated with aggression in men. In  
62 women however, these correlations were negative [42]. Cashdan [23], examined hormones and  
63 competitive aggression in 30 women and found that women with low levels of testosterone were  
64 less likely to express their competitive feelings through verbal aggression than women with  
65 higher levels of testosterone. That study, however, also found that estradiol was not related to  
66 competitive tactics. Women with high estradiol levels reported fewer competitive interactions in  
67 athletics than did other women. Aggression has been associated with high testosterone and low  
68 cortisol levels in women [26], as well as negatively associated with estradiol levels [32].

69 While some research has found social rank to be associated with stress in primates as measured  
70 by elevated cortisol levels [25, 43, 44], other research has found no association [25]. There is  
71 evidence to support that high levels of estradiol and high levels of progesterone are associated  
72 with low levels of aggression and that estradiol may also influence behaviors in women other  
73 than aggression including dominance, assertiveness, and risk-taking behaviors [26].  
74  
75 More recently, there has been a focus on understanding how hormone levels may jointly  
76 influence dominance and other status-seeking behaviors in humans with respect to leadership.  
77 Mehta and Josephs [30], examined hormone regulation of dominance in women leaders. They  
78 contend that leadership is one of the most important domains within which to study status and  
79 social dominance. For their study men and women were randomly assigned to the position of a  
80 leader or follower and then asked to complete a leadership task in a simulated competition (how  
81 to move blocks to make a specific design). These interactions were video-taped, observations  
82 recorded, and each identified leader was rated in terms of dominance. Mehta and Josephs [30]  
83 developed a 12-item scale that indexed dominance in leaders. These items assessed dominance as  
84 characterized by behaviors linked to, motivation to gain high status including assertiveness,  
85 confidence, being energetic, enthusiastic, extraverted, and verbally fluent, display leader-like and  
86 directive behavior, being decisive, displaying masculinity and an expansive posture. Using  
87 salivary samples, their results revealed that testosterone interacted with cortisol to predict  
88 dominance in leaders – that is, dominance in leaders can be predicted by the joint regulation of  
89 testosterone and cortisol, where low cortisol and higher testosterone together, are related to  
90 increased dominance [30]. In their study on leadership position and circulating testosterone and  
91 cortisol levels in male executives, Sherman et al. [14] evaluated the relationship between salivary

92 cortisol and testosterone levels and a measure of attained status – the number of subordinates  
93 over which the executive had authority. They found that executive males who exhibited high  
94 testosterone and low cortisol levels were more likely to occupy high-status positions whereas  
95 low-testosterone, low-cortisol executives were more likely to occupy lower status positions [14].  
96 Testosterone has also been implicated in sexual behavior of women [29]. For example, Udry [45]  
97 found that though testosterone was positively related to interest in sexual behavior for both males  
98 and females, for females specifically, this interest is only expressed in the absence of a father and  
99 low participation in team sports [45].  
100  
101 When it comes to estradiol, progesterone, and the peptide hormone oxytocin however, research is  
102 scant. Where research in this area has been undertaken, oxytocin has been found to potentially  
103 increase aggression in women by lowering perceptions of danger that would normally inhibit  
104 women from retaliating. Low levels of aggression have also been associated with elevated levels  
105 of estradiol and progesterone [26]. Though testosterone is required for the expression of  
106 masculine traits such as aggression in most vertebrates, including mice and humans, estrogen  
107 also plays a role [46]. The enzyme aromatase converts testosterone into estrogen and thus  
108 increased levels of testosterone lead to increased levels of estrogen [46]. Despite the dual  
109 requirement of estrogen and testosterone for the expression of masculine behaviors, how these  
110 dual hormonal pathways are expressed by alpha females has not been examined.  
111  
112 Although it has been established that hormones respond to social context and vice versa [35],  
113 what is not clear is how these responses are shaped by social norms related to gender, in this  
114 case, a specific archetype of female identity, the alpha female. What is absent from the literature

115 is whether variability in the expression of female identity, specifically between alpha and non-  
116 alpha women, may, or may not be connected to neuroendocrine expression. The present research  
117 tests the relationships between hormonal and behavioral traits of the alpha female to gain greater  
118 insight into our understanding of the alpha female identity from a biosocial perspective. The  
119 results of the present study provide an opportunity to better understand whether hormones may  
120 represent a biological expression of the alpha female identity. Specifically, the present research  
121 seeks to understand the associations between cortisol, testosterone, and alpha female attributes as  
122 well as how other hormones such as estradiol, progesterone, and oxytocin, may also play a role  
123 in the expression of this female identity. Examined alongside results from recent research on the  
124 expression of the alpha female identity which found masculine traits to be a predictor of alpha  
125 status [40], it is predicted that alpha women will exhibit higher testosterone but lower cortisol  
126 levels than non-alpha females. It is also predicted that testosterone will be positively associated  
127 with masculine traits.

128

## 129 **Methods**

### 130 **Participants, recruitment and exclusion**

131 Recently, Sumra [40] conducted an extensive review and textual analyses of the academic and  
132 popular literature of the human alpha female to examine the social construction and expression  
133 of the alpha female identity in a small non-random sample of North American women (N=398).  
134 In that study [40], participants completed a 96-question survey and were asked questions in the  
135 end of this survey about the alpha female identity. Participants could not go back to change their  
136 answers. Included at the end of that survey was a definition of the alpha female following which

137 women were asked to respond yes, no, or maybe as to whether they considered themselves an  
138 alpha female based on that definition. That review revealed 2 predominant alpha female  
139 representations in the academic and popular literature – one more masculine versus one more  
140 feminine – and 21 variables likely to be associated with the expression of the alpha female  
141 identity. That study [40] found that the alpha female was a recognized socially constructed  
142 female identity. Univariate analysis revealed positive and highly significant differences in self-  
143 reported mean scores between alpha (N=94) and non-alpha (N=304) females for 10 variables  
144 related to expression of the alpha female identity. In that study [40], the measure of masculine  
145 traits was identified as the only predictor of alpha female status as per the multiple regression  
146 model. Interestingly, both alpha and non-alpha women scored the same for the measure of  
147 feminine traits. Further, both groups scored higher for feminine traits than masculine traits.  
148 Participants for the present study were recruited from Sumra's [40] previous study. As chemical  
149 birth control or hormonal therapy may influence hormone levels, women who indicated either  
150 were excluded. A total of 32 alpha and 94 non-alpha women remained for a total of 126  
151 participants. The present study evaluates the potential associations between 5 specific hormones  
152 (cortisol, estradiol, progesterone, oxytocin, and testosterone), and 10 alpha female -related traits  
153 which include measures of masculinity, leadership, strength, low introversion, self-esteem, life  
154 satisfaction, sexual experience, initiating sex, enjoying sexual intercourse, and playing a  
155 dominant role in sexual encounters, which were found to be associated with the expression of the  
156 alpha female identity in Sumra's 2019 [40] study. The average age category for the sample  
157 across all women was 35-37 years, and the average education level was a bachelor's degree. For  
158 those women who were employed the average income was approximately \$58,000.00 annually.  
159

## 160 **Measures**

### 161 **Bem Sex Role Inventory (BSRI) – Masculine and Feminine Personality Traits**

162 Since its development over four decades ago, the *Bem Sex Role Inventory* or BSRI [47] has been  
163 the most commonly used and repeatedly validated measure of gender roles and traits [48]. The  
164 original BSRI [47] includes 60 dichotomous items divided into 3 subscales - masculinity,  
165 femininity, and neutral. Each subscale includes 20 adjectives that represent typical masculine,  
166 feminine, and 20 neutral traits in Western society. The condensed versions of the BSRI-M and  
167 BSRI-F based on a total of 10 alpha female related behavioral traits in Sumra's 2019 work [40]  
168 were used in the present study. These versions exhibited adequate internal consistency for both  
169 the BSRI-M (Cronbach's  $\alpha=0.64$ ) and the BSRI-F (Cronbach's  $\alpha=0.72$ ). Respondents were  
170 asked to score each item on a 5-point Likert Scale from *never* (1) to *always* (5). Means for  
171 masculine and feminine categories were calculated to derive corresponding masculinity and  
172 femininity scores. Higher masculinity scores indicate higher affiliation with masculine traits,  
173 higher feminine scores indicate higher affiliation with feminine traits, equal scores in both  
174 masculine and feminine traits indicate androgyny, and low scores in both masculinity and  
175 femininity indicate an undifferentiated gender.

176

### 177 **The Alpha Female Inventory (AFI) Leadership, Strength and Low**

#### 178 **Introversion (extroversion)**

179 The subscales of the Alpha Female Inventory (AFI) developed by Ward, Popson, and DiPaolo  
180 [49], was used to measure leadership (AFI-L), strength (AFI-S), and extroversion (AFI-LI). The  
181 AFI [49] is a 14-item measure of alpha female personality. Items are scored on a 5-point Likert



182 scale from *strongly disagree*-1 to *strongly agree*-5 and summed, with higher scores indicating  
183 greater levels of leadership (the desire to be a leader, dominant, and assertive), strength  
184 (perceived superiority and physical strength), and low introversion (as an index of extroversion).  
185 Defined by Ward, Popson, and DiPaolo [49] as “being quiet and withdrawn from social  
186 situations”, low introversion, is considered a proxy measure of extroversion. AFI-LI items are  
187 reverse-coded where higher scores indicate lower levels of being quiet and withdrawn.

188

### 189 **Rosenberg Self-Esteem Scale (RSES) – Self-Esteem**

190 The Rosenberg Self-Esteem Scale (RSES) [50] is a validated measure of self-esteem. Composed  
191 of 10 items that assess both positive and negative feelings about the self or “self-worth”, it is the  
192 most widely used self-report instrument of confidence and self-esteem [51]. The RSES is  
193 unidimensional and items are scored on a 4-point Likert-type scale ranging from *strongly*  
194 *disagree* (0) to *strongly agree* (3) [51]. The RSES was modified to reflect an additional choice of  
195 *neutral* (3) to avoid neutral response bias. Research suggests that because negatively worded  
196 items may be interpreted differently by different groups, using the RSES may have limited value  
197 [52]. Inclusion of a neutral avoids responses at the extreme ends of the RSES [52]. The resulting  
198 scale was a 5-point Likert scale ranging from *strongly disagree* (1) to *strongly agree* (5). Some  
199 questions were also reworded for simplicity and clarity. Items were summed, and higher scores  
200 indicated greater self-esteem.

201

### 202 **Sexual dominance aspects – Frequency, Dominant Role, Sexual Experience,**

### 203 **Initiating, and Enjoying Sex**

204 Five aspects of sexual dominance previously used in Sumra’s 2019 study [40] were assessed.  
205 These included sex frequencies, playing a dominant role in sexual encounters, taking initiative in  
206 sexual encounters, enjoyment during sex, and sexual experience.

207

## 208 **Life Satisfaction**

209 The present study also included an assessment of life satisfaction. A single question was asked,  
210 “Describe the level of satisfaction and fulfillment you feel in your life”. Responses were scored  
211 on a 5-point Likert scale (0-none, 1-low, 2-moderate, 3-high, and 4-extremely high).

212

## 213 **Hair Hormone Analysis**

214 Hair has become recognized as a reliable substrate for measuring hormone concentrations in  
215 animals and humans [53-58]. When compared to other methods of sampling such as blood, urine,  
216 and saliva, hair sampling is considered most non-invasive, and samples can be collected by non-  
217 health care professionals [55]. Unlike urine, saliva, and blood, hormone concentrations in hair  
218 are expressed over a longer period of time rather than at a given point in time [59]. In the field of  
219 hair hormone analysis, most research in this area has focused primarily on the assessment of  
220 chronic stress and the analysis of the stress hormone cortisol in hair [60]. Saliva, blood, and urine  
221 are subject to circadian variation in hormone secretion resulting in fluctuating levels over a 24-  
222 hour period [61]. For example, salivary, blood, and urinary cortisol levels are typically measured  
223 over a 24-hour period usually starting with a first morning sample with subsequent samples taken  
224 at intervals throughout the day. Single urine samples collected at any given time reflect cortisol  
225 secretion since the last urinary void. Only urine collected throughout the day captures cortisol  
226 secretion over a 24-hour period [59]. Where urine samples can provide hormonal profiles for a

227 24-hour period, saliva and serum provide “point estimates” for cortisol secreted prior to  
228 collection (~20 minutes for saliva and <3 minutes for blood) [62].

229 For the present study, hair samples were sent to a commercial lab (Viagaurd Accu-Metrics,  
230 Toronto, Canada) for measurement of cortisol, estradiol, testosterone, progesterone, and oxytocin  
231 concentrations. Use of a special collection kit ensured the root ends faced the same direction.  
232 Hair were cut close to the scalp to ensure that the sample was collected between periods of dying  
233 hair, if hair was dyed on a regular basis. All kits were sealed and stored in individual envelopes.  
234 Samples were prepared using the first 3 centimeters of hair closest to the scalp which were  
235 washed in isopropyl alcohol by soaking for 5 minutes followed by a rinse. Any hair follicles that  
236 were present were cut to ensure that only hormones from the hair shaft were extracted. Because  
237 the hair roots had been removed, only hormone concentrations from the hair shaft were  
238 extracted. Hair shaft samples were cut into small pieces with surgical scissors then weighed in a  
239 1.5mL tube. The weight of the samples ranged between 0.69 and 3.67 mg. The samples were  
240 then ground to a fine powder prior to an overnight extraction in methanol. The supernatant from  
241 each of the extractions was then removed and evaporated until completely dry. Once the  
242 methanol had been removed, each sample was re-suspended in 250 $\mu$ L of phosphate-buffered  
243 saline (PBS) at pH 8.0. The samples were vortexed for 1 min until the extract was dissolved. The  
244 cortisol, estradiol, testosterone, progesterone, and oxytocin extracted from the hair were  
245 measured using gas chromatography/mass spectrometry with standards for each of these  
246 hormones as reference. The dissolved supernatant for each hormone was compared with the  
247 standard and normalized with the weight of the hair to give pg/mg values. The respective  
248 analytical errors were assessed by replicate measures of cortisol, estradiol, testosterone,  
249 progesterone, and oxytocin standards and determined to be  $\pm 7$  pg/mg.

250

251

## 252 **Ethics Statement**

253 This research, including the method of obtaining informed consent, was approved by the  
254 University of Toronto's Research Ethics Board (Protocol #27117). Informed consent was  
255 obtained for each phase of the present study from all participants. Signed consent forms were  
256 obtained from those participants who provided hair samples before data collection which were  
257 retained by the primary author. Terms of service were adhered to for all social media websites  
258 where data were collected.

259

## 260 **Statistical Analyses**

261 Descriptive statistics including the mean, median and standard deviation were run for all  
262 variables. These included 5 hormone variables CORT (cortisol), EST (estradiol), PROG  
263 (progesterone), OXY (oxytocin,) and TEST (testosterone), and the 10 alpha female behavioral  
264 variables and the measure of feminine traits identified in Sumra's [40] 2019 study. Differences  
265 between the alpha and non-alpha groups were assessed using nonparametric Mann-Whitney U-  
266 tests. All statistical tests were conducted using the Number Cruncher Statistical Systems (NCSS)  
267 statistical software package [63].

268

## 269 **Results**

270 The results from the Mann-Whitney U tests revealed that when compared to non-alpha females,  
271 alpha females (N=32) had significantly higher mean scores for masculine traits (BSRI-M),  
272 leadership, low introversion, and self-esteem (RSES), and exhibited lower cortisol (CORT)

273 levels than non-alpha females (N=94) (Table 1). Small but non-significant differences in  
 274 strength, BSRI-F, life satisfaction, initiates sex and enjoys sex were also found. Alpha females  
 275 exhibited slightly lower levels of estradiol (EST) and oxytocin (OXY) than non-alphas, and  
 276 although they scored higher in sexual experience, playing a dominant role in sexual encounters  
 277 (Dom\_Role\_Sex), testosterone (TEST), and progesterone (PROG) than non-alpha women, these  
 278 differences were not significant statistically.

279  
 280 The results from the nonparametric correlation analysis revealed a number of significant  
 281 relationships (Table 2). Cortisol was positively correlated with leadership and negatively  
 282 correlated with strength and feminine traits (BSRI-F). Progesterone and oxytocin were positively  
 283 correlated with sexual enjoyment (Enjoys Sex) as was testosterone. Oxytocin was also positively  
 284 correlated with playing a dominant role in sexual encounters (Dom\_Role\_Sex), and negatively  
 285 correlated with masculine traits (BSRI-M). Estradiol (EST) was not correlated with any of the  
 286 variables. Leadership position in the workplace as measured by management level is included in  
 287 (Table 3). Approximately 44% of alpha females held a mid to upper management position versus  
 288 35% of non-alpha females.

289

Table 1. Results from univariate analyses for alpha and non-alpha female groups

| Variable                  | Alpha |        |       | Non-Alpha |        |       | P-value<br>(Mann-Whitney<br>U Test) |
|---------------------------|-------|--------|-------|-----------|--------|-------|-------------------------------------|
|                           | N     | Mean   | SD    | N         | Mean   | SD    |                                     |
| Masculine Traits (BSRI-M) | 32    | 3.806  | 0.395 | 94        | 3.534  | 0.456 | <0.001                              |
| Feminine Traits (BSRI-F)  | 32    | 4.187  | 0.451 | 94        | 4.1    | 0.467 | 0.358                               |
| Leadership                | 32    | 20.219 | 3.338 | 94        | 18.096 | 3.642 | <0.05                               |
| Strength                  | 32    | 16.75  | 2.639 | 94        | 15.925 | 2.352 | 0.099                               |
| Low Introversion          | 32    | 13.75  | 2.747 | 94        | 12.425 | 3.244 | <0.05                               |
| Self-Esteem (RSES)        | 32    | 39.719 | 6.624 | 94        | 37.181 | 5.98  | <0.05                               |
| Life Satisfaction         | 32    | 2.5    | 0.824 | 94        | 2.531  | 0.786 | 0.846                               |
| Sexual Experience         | 32    | 1.875  | 1.039 | 91        | 1.538  | 0.981 | 0.102                               |
| Initiate Sex              | 32    | 2.688  | 1.029 | 91        | 2.582  | 0.844 | 0.569                               |
| Enjoy Sex                 | 31    | 4.194  | 1.138 | 91        | 4.022  | 1.053 | 0.444                               |
| Dom Role_Sex              | 32    | 2.406  | 0.797 | 91        | 2.242  | 0.848 | 0.339                               |
| CORT                      | 32    | 28.389 | 6.531 | 94        | 31.765 | 7.309 | <0.05                               |

|            |    |        |       |    |        |       |       |
|------------|----|--------|-------|----|--------|-------|-------|
| EST        | 32 | 0.866  | 0.311 | 94 | 0.931  | 0.327 | 0.324 |
| PROG       | 32 | 28.064 | 8.145 | 94 | 26.218 | 8.814 | 0.299 |
| OXY        | 32 | 7.967  | 1.922 | 94 | 8.122  | 2.088 | 0.711 |
| TEST       | 32 | 0.746  | 0.313 | 94 | 0.661  | 0.344 | 0.202 |
| Education  | 32 | 3.213  | 1.252 | 94 | 3.398  | 1.026 | 0.124 |
| Employment | 32 | 3.249  | 0.761 | 94 | 3.046  | 0.739 | 0.175 |
| Income     | 32 | 3.638  | 1.789 | 94 | 3.579  | 1.702 | 0.842 |

290

291

292

293

294

WITHDRAWN  
see manuscript DOI for details

Table 2. Nonparametric Spearman correlations among variables used in the study (N=126) \*P<0.05, \*\*P<0.01, \*\*\*P<0.0001

|                     | Leadership | Strength | Low Int. | Self-Esteem RSES | Masc. Traits BSRI-M | Fem. Traits BSRI-F | Life Sat. | Enjoys Sex | Init.Sex | Dom_Role_Sex | Sex Exp | CORT   | EST   | PROG  | OXY    | TEST |
|---------------------|------------|----------|----------|------------------|---------------------|--------------------|-----------|------------|----------|--------------|---------|--------|-------|-------|--------|------|
| Leadership          | 1          |          |          |                  |                     |                    |           |            |          |              |         |        |       |       |        |      |
| Strength            | 0.270**    | 1        |          |                  |                     |                    |           |            |          |              |         |        |       |       |        |      |
| Low Int.            | 0.473***   | 0.393*** | 1        |                  |                     |                    |           |            |          |              |         |        |       |       |        |      |
| Self-Esteem RSES    | 0.485***   | 0.381*** | 0.474*** | 1                |                     |                    |           |            |          |              |         |        |       |       |        |      |
| Masc. Traits BSRI-M | 0.438***   | 0.515*** | 0.542*** | 0.322***         | 1                   |                    |           |            |          |              |         |        |       |       |        |      |
| Fem. Traits BSRI-F  | 0.062      | 0.085    | 0.164    | 0.13             | 0.168               | 1                  |           |            |          |              |         |        |       |       |        |      |
| Life Sat.           | -0.192*    | -0.062   | -0.137   | -0.157           | -0.023              | 0.132              | 1         |            |          |              |         |        |       |       |        |      |
| Enjoys Sex          | 0.095      | 0.048    | 0.065    | -0.053           | 0.069               | -0.05              | 0.122     | 1          |          |              |         |        |       |       |        |      |
| Initiates Sex       | 0.018      | -0.047   | 0.04     | 0.043            | -0.002              | -0.019             | 0.135     | 0.548***   | 1        |              |         |        |       |       |        |      |
| Dom_Role_Sex        | 0.061      | 0.01     | 0.065    | -0.021           | 0.017               | -0.014             | 0.198*    | 0.357***   | 0.553*** | 1            |         |        |       |       |        |      |
| Sex Exp             | 0.098      | -0.002   | 0.059    | 0.126            | 0.194*              | -0.019             | -0.075    | 0.183*     | 0.018    | -0.005       | 1       |        |       |       |        |      |
| CORT                | 0.177**    | -0.182** | -0.003   | 0.091            | 0.115               | -0.187*            | 0.023     | -0.02      | 0.03     | 0.017        | -0.003  | 1      |       |       |        |      |
| EST                 | 0.073      | -0.02    | -0.063   | 0.027            | -0.09               | -0.016             | 0.114     | -0.062     | 0.055    | 0.013        | -0.069  | 0.163  | 1     |       |        |      |
| PROG                | 0.037      | -0.083   | -0.029   | 0.063            | -0.089              | -0.085             | 0.029     | 0.243**    | 0.079    | 0.097        | 0.047   | 0.071  | 0.096 | 1     |        |      |
| OXY                 | 0.021      | -0.113   | -0.09    | -0.107           | -0.231**            | 0.066              | -0.092    | 0.196*     | 0.147    | 0.259**      | 0.028   | -0.108 | 0.1   | 0.104 | 1      |      |
| TEST                | 0.137      | -0.155   | 0.138    | 0.019            | -0.062              | 0.068              | 0.046     | 0.024      | -0.05    | 0.039        | 0.078   | -0.139 | 0.078 | 0.019 | 0.197* | 1    |

Table 3. Management position and alpha status

| <b>Position</b>   | <b>alphas</b> | <b>%</b> | <b>non-alphas</b> | <b>%</b> | <b>P-value</b> |
|-------------------|---------------|----------|-------------------|----------|----------------|
| Non to low mgmt   | N=18          | 0.56     | N=61              | 0.65     | 0.597          |
| Mid to upper mgmt | N=14          | 0.44     | N=33              | 0.35     |                |
|                   | 32            |          | 94                |          |                |

WITHDRAWN  
see manuscript DOI for details



## 297 **Discussion**

298 The present study examined the relationship between 5 hormones (cortisol, estradiol,  
299 progesterone, oxytocin, and testosterone) and 11 alpha female variables in a small non-random  
300 sample of women in North America (N=126). As predicted, alpha women exhibited higher  
301 testosterone and lower cortisol levels than non-alpha women. Only the difference in cortisol  
302 levels between alpha and non-alphas, however, was statistically significant. Within this context,  
303 these results are consistent with similar research in humans [13,14], and non-human primates  
304 [20] and contribute to the growing research on dual-hormone patterns with respect to  
305 testosterone and cortisol [15, 64]. For example, Sapolsky [20], found that in stable dominance  
306 hierarchies of wild olive baboons, subordinate males exhibited higher cortisol levels than alpha  
307 males. In Sherman et al.'s [14] study, high testosterone and low cortisol predicted the number of  
308 subordinates among male business executives. Other research on the association between cortisol  
309 levels and alpha status, however, have revealed mixed results [18, 65].

310  
311 Alpha individuals are found both to have higher [18, 65] and lower cortisol levels than non-  
312 alphas [13, 14, 18, 21]. According to Sapolsky and Ray [65], when it comes to nonhuman  
313 primates, dominance style problematizes the validity of low cortisol levels as a marker for alpha  
314 status. For example, Sapolsky and Ray [65] found that low cortisol levels are not necessarily a  
315 feature of all dominant male baboons in stable hierarchies. Low cortisol levels are exhibited by  
316 alpha males who engage in a particular style of dominance in alpha males who display a high  
317 degree of social skillfulness, control, and predictability over social hazards, such as, the ability to  
318 distinguish between winning or losing a fight [65]. In contrast, alpha males without this skillset  
319 were found to have cortisol concentrations as high as subordinate males [65]. Further Sapolsky

320 and Ray [65] found that male baboons who held longer alpha tenure had exhibited lower cortisol  
321 levels [65]. This suggests that cortisol levels in alpha individuals may fluctuate over time. In the  
322 case of the present research, perhaps the longer a woman identifies as an alpha female, the lower  
323 her cortisol levels may be. The results of the present study revealed a positive association  
324 between cortisol levels and leadership scores across all women. This result is significant for  
325 future research that examines the relationship between cortisol levels in women and leadership  
326 position in the workplace.

327

328 The finding that testosterone is not correlated with masculine traits in the present group of  
329 women is inconsistent with previous research that have found masculine traits to be positively  
330 correlated with testosterone concentration in women. For example, Baucom, Besch, and  
331 Callahan's [27] study of 84 undergraduate students who completed Baucom's Masculinity and  
332 Femininity Scales [66] as well as the BSRI and an Adjective Check List, found that women with  
333 higher masculinity scores exhibited higher testosterone levels than women with higher  
334 femininity scores. They also found that women with higher testosterone levels perceived  
335 themselves as self-directed, action-oriented, and resourceful [27]. It is important to note  
336 however, that Baucom, Besch, and Callahan [27] stated that masculine-sex-typed females  
337 (women who scored higher for masculine traits than feminine traits) exhibited "somewhat"  
338 higher testosterone levels than more feminine-sex-typed females (women who scored higher for  
339 feminine traits than masculine traits).

340

341

## 342 **Limitations and Future Research**

343 The results of the present research are subject to several important limitations. First, the present  
344 study relies on self-identification and does not include data on how those women would be  
345 identified by others (e.g. as alpha or non-alpha). Though self-identification and alpha-identity  
346 perception (positive, neutral, or negative) could be considered measurable aspects of identity,  
347 they are not the only ones. Entativity, or the degree to which groups are perceived by outsiders or  
348 non-group members represents another dimension [67]. The opinions and perceptions of non-  
349 alpha women and men, and particular self-identified alpha women, may also provide insight into  
350 the social construction of the alpha female identity.

351  
352 The present study is also limited by non-random sampling, and therefore may include some bias,  
353 the nature of which is unknown. It is also potentially limited by small sample sizes for both the  
354 non-alpha and alpha sampling groups. It is therefore possible that the results do not accurately  
355 reflect the differences between these groups of women in North America. Both of these sampling  
356 limitations might affect the generalizability of the results to a larger population beyond the scope  
357 of the present study.

358  
359 Similar to Sherman et al. [13], the present findings raise the possibility that higher testosterone  
360 levels in conjunction with lower cortisol levels may predispose women to regard themselves as  
361 alpha female. Though hormones can affect many aspects of human behavior, the correlations  
362 between specific hormones and specific behaviors are often weak and are likely influenced by  
363 many factors [68]. As data were collected through the survey and focus groups, self-identified  
364 alpha females were not observed in their natural environments limiting insight into how

365 behaviors may be mediated or enhanced by hormones within different social contexts. This is  
366 important because humans have complex social lives operating in varying contexts, belong to  
367 different social groups and hierarchies, and perform a variety of social roles [22]. Within this  
368 context, a self-identified alpha female may not necessarily mean that she is all alpha, all of the  
369 time [40]. Future ethnographic research focused on the daily lived experiences and the various  
370 contexts of the alpha female may provide greater insight into the potential fluidity and variation  
371 in the hormonal expression of the alpha female identity.

372  
373 Future research that evaluates the relationships between testosterone and cortisol, and female  
374 leaders who are considered alpha and non-alpha, may shed light on whether these particular  
375 hormones do in fact play a role in the likelihood of occupying a leadership position for women  
376 more generally, and more importantly, may also provide the opportunity to gain deeper insight  
377 into a potential variant of leadership itself – the alpha female leader. Additionally, the result that  
378 leadership is positively associated with stress warrants follow-up research on alpha females who  
379 occupy leadership roles.

380 It is important to note that there have been very few examples in the literature of oxytocin being  
381 measured in hair. In one study by Hamel [69], it was determined that hair likely does not provide  
382 a good means for measuring long-term oxytocin levels, and that oxytocin may not be  
383 incorporated into hair in the same way as cortisol. It is unclear in that study, however, whether  
384 the extraction of oxytocin from hair, or measurement by enzyme immunoassay (EIA) is the basis  
385 of that determination in that study. As such, it is unclear whether the measurement of oxytocin  
386 by mass spectrometry in the present study mitigates the problems with measuring oxytocin in  
387 hair suggested by Hamel [69].

388

389

## 390 **Conclusions**

391 The present research contributes to and has direct implications for research on dominance and  
392 status-seeking behaviors in humans, specifically research on the human alpha female. It also has  
393 direct implications for future leadership and alpha leadership research, and for the study of social  
394 hierarchy in organizational research, including research that examines associations between  
395 hormones and the attainment of social and professional status [13,14]. The finding that alpha  
396 women exhibit lower cortisol levels than non-alpha women also has implications for research on  
397 the relationship between alpha status and stress in humans.

398 Consideration of the findings of the present study alongside with those of Sumra [40], which  
399 found that masculine traits predicted alpha status, raises more food for thought on what it means  
400 to be an alpha female from a biosocial perspective. Alpha females associate leadership, self-  
401 esteem, and being less introverted more with their identity more than other women and they are  
402 less stressed as indexed by the hormone cortisol. Thus, the answer to the question “are hormone  
403 levels associated with being an alpha female”, for this group of women, is yes, however, only in  
404 the case of cortisol.

405

## 406 **Acknowledgments**

407

408 I would like to thank Dr. Michael Schillaci in the Department of Anthropology at the University  
409 of Toronto Scarborough for his support, advice, and critical input.

410

## 411 References

- 412 1. Zak PJ, Kurzban R, Matzner WT. The Neurobiology of Trust. *Annals of the New*  
413 *York Academy of Sciences*. 2004;1032: 224–227. doi:10.1196/annals.1314.025
- 414 2. Zak P, Kurzban R, Matzner W. Oxytocin is associated with human trustworthiness.  
415 *Hormones and Behavior*. 2005;48: 522–527. doi:10.1016/j.yhbeh.2005.07.009
- 416 3. Zak PJ. The Neuroeconomics of Trust. *SSRN Electronic Journal*. 2005;  
417 doi:10.2139/ssrn.764944
- 418 4. Bos PA, Terburg D, Honk JV. Testosterone decreases trust in socially naive humans.  
419 *Proceedings of the National Academy of Sciences*. 2010;107: 9991–9995.  
420 doi:10.1073/pnas.0911700107
- 421 5. Stanton SJ, Labar KS, Saini EK, Kuhn CM, Beehner JC. Stressful politics: Voters’  
422 cortisol responses to the outcome of the 2008 United States Presidential election.  
423 *Psychoneuroendocrinology*. 2010;35: 768–774. doi:10.1016/j.psyneuen.2009.10.018
- 424 6. Stanton SJ, Beehner JC, Saini EK, Kuhn CM, Labar KS. Dominance, Politics, and  
425 Physiology: Voters Testosterone Changes on the Night of the 2008 United States  
426 Presidential Election. *PLoS ONE*. 2009;4. doi:10.1371/journal.pone.0007543
- 427 7. Anderson C, Kilduff GJ. Why do dominant personalities attain influence in face-to-  
428 face groups? The competence-signaling effects of trait dominance. *Journal of*  
429 *Personality and Social Psychology*. 2009;96: 491–503. doi:10.1037/a0014201
- 430 8. Mehta PH, Josephs RA. Testosterone and cortisol jointly regulate dominance:  
431 Evidence for a dual-hormone hypothesis. *Hormones and Behavior*. 2010;58: 898–  
432 906. doi:10.1016/j.yhbeh.2010.08.020
- 433 9. Feldman R, Gordon I, Zagoory-Sharon O. Maternal and paternal plasma, salivary,  
434 and urinary oxytocin and parent-infant synchrony: considering stress and affiliation  
435 components of human bonding. *Developmental Science*. 2011;14: 752–761.  
436 doi:10.1111/j.1467-7687.2010.01021.x
- 437 10. Gettler LT. Applying socioendocrinology to evolutionary models: Fatherhood and  
438 physiology. *Evolutionary Anthropology: Issues, News, and Reviews*. 2014;23: 146–  
439 160. doi:10.1002/evan.21412
- 440 11. Weisman O, Zagoory-Sharon O, Feldman R. Oxytocin administration, salivary  
441 testosterone, and father–infant social behavior. *Progress in Neuro-*  
442 *Psychopharmacology and Biological Psychiatry*. 2014;49: 47–52.  
443 doi:10.1016/j.pnpbp.2013.11.006

- 444 12. Jaeggi AV, Trumble BC, Kaplan HS, Gurven M. Salivary oxytocin increases  
445 concurrently with testosterone and time away from home among returning Tsimane  
446 hunters. *Biology Letters*. 2015;11: 20150058–20150058. doi:10.1098/rsbl.2015.0058
- 447 13. Sherman GD, Lee JJ, Cuddy AJC, Renshon J, Oveis C, Gross JJ, et al. Leadership is  
448 associated with lower levels of stress. *Proceedings of the National Academy of*  
449 *Sciences*. 2012;109: 17903–17907. doi:10.1073/pnas.1207042109
- 450 14. Sherman GD, Lerner JS, Josephs RA, Renshon J, Gross JJ. The interaction of  
451 testosterone and cortisol is associated with attained status in male executives. *Journal*  
452 *of Personality and Social Psychology*. 2016;110: 921–929. doi:10.1037/pspp0000063
- 453 15. Sherman GD, Rice LK, Jin ES, Jones AC, Josephs RA. Sex differences in cortisol's  
454 regulation of affiliative behavior. *Hormones and Behavior*. 2017;92: 20–28.  
455 doi:10.1016/j.yhbeh.2016.12.005
- 456 16. Soares MC, Bshary R, Fusani L, Goymann W, Hau M, Hirschenhauser K, et al.  
457 Hormonal mechanisms of cooperative behaviour. *Philosophical Transactions of the*  
458 *Royal Society B: Biological Sciences*. 2010;365: 2737–2750.  
459 doi:10.1098/rstb.2010.0151
- 460 17. Mazur A, Booth A. Testosterone and dominance in men. *Behavioral and Brain*  
461 *Sciences*. 1998;21: 353–363. doi:10.1017/s0140525x98001228
- 462 18. Sapolsky RM. The endocrine stress-response and social status in the wild baboon.  
463 *Hormones and Behavior*. 1982;16: 279–292. doi:10.1016/0018-506x(82)90027-7
- 464 19. Sapolsky RM. Individual Differences in Cortisol Secretory Patterns in the Wild  
465 Baboon: Role of Negative Feedback Sensitivity\*. *Endocrinology*. 1983;113: 2263–  
466 2267. doi:10.1210/endo-113-6-2263
- 467 20. Sapolsky RM. Hypercortisolism Among Socially Subordinate Wild Baboons  
468 Originates at the CNS Level. *Archives of General Psychiatry*. 1989;46: 1047.  
469 doi:10.1001/archpsyc.1989.01810110089012
- 470 21. Sapolsky R. Testicular function, social rank and personality among wild baboons.  
471 *Psychoneuroendocrinology*. 1991;16: 281–293. doi:10.1016/0306-4530(91)90015-1
- 472 22. Sapolsky RM. Social Status and Health in Humans and Other Animals. *Annual*  
473 *Review of Anthropology*. 2004;33: 393–418.  
474 doi:10.1146/annurev.anthro.33.070203.144000
- 475 23. Cashdan E. Hormones, Sex, and Status in Women. *Hormones and Behavior*. 1995;29:  
476 354–366. doi:10.1006/hbeh.1995.1025

- 477 24. Carré J, Olmstead N. Social neuroendocrinology of human aggression: Examining the  
478 role of competition-induced testosterone dynamics. *Neuroscience*. 2015;286: 171–  
479 186. doi:10.1016/j.neuroscience.2014.11.029
- 480 25. Feng X, Wu X, Morrill RJ, Li Z, Li C, Yang S, et al. Social correlates of the  
481 dominance rank and long-term cortisol levels in adolescent and adult male rhesus  
482 macaques (*Macaca mulatta*). *Scientific Reports*. 2016;6. doi:10.1038/srep25431
- 483 26. Denson TF, O’Dean SM, Blake KR, Beames JR. Aggression in Women: Behavior,  
484 Brain and Hormones. *Frontiers in Behavioral Neuroscience*. 2018;12.  
485 doi:10.3389/fnbeh.2018.00081
- 486 27. Baucom DH, Besch PK, Callahan S. Relation between testosterone concentration, sex  
487 role identity, and personality among females. *Journal of Personality and Social*  
488 *Psychology*. 1985;48: 1218–1226. doi:10.1037//0022-3514.48.5.1218
- 489 28. Grant VJ, France JT. Dominance and testosterone in women. *Biological Psychology*.  
490 2001;58: 41–47. doi:10.1016/s0301-0511(01)00100-4
- 491 29. Booth A, Granger DA, Mazur A, Kivlighan KT. Testosterone and Social Behavior.  
492 *Social Forces*. 2006;85: 167–191. doi:10.1353/sof.2006.0116
- 493 30. Mehta P, Josephs R. Social Endocrinology: Chapter 9: Hormones and Social  
494 Motivation. In *Frontiers in Social Psychology*, ed. D. Dunning, pp. 171-189, New  
495 York: Psychology Press.
- 496 31. Madison G, Aasa U, Wallert J, Woodley MA. Feminist activist women are  
497 masculinized in terms of digit-ratio and social dominance: a possible explanation for  
498 the feminist paradox. *Frontiers in Psychology*. 2014;5. doi:10.3389/fpsyg.2014.01011
- 499 32. Stanton SJ, Schultheiss OC. Basal and dynamic relationships between implicit power  
500 motivation and estradiol in women. *Hormones and Behavior*. 2007;52: 571–580.  
501 doi:10.1016/j.yhbeh.2007.07.002
- 502 33. Mccarthy MM, Mcdonald CH, Brooks PJ, Goldman D. An Anxiolytic Action of  
503 Oxytocin is Enhanced by Estrogen in the Mouse. *Physiology & Behavior*. 1996;60:  
504 1209–1215. doi:10.1016/s0031-9384(96)00212-0
- 505 34. Ziegler TE. Female sexual motivation during non-fertile periods: A primate  
506 phenomenon. *Hormones and Behavior*. 2007;51: 1–2.  
507 doi:10.1016/j.yhbeh.2006.09.002
- 508 35. Anders SMV, Steiger J, Goldey KL. Effects of gendered behavior on testosterone in  
509 women and men. *Proceedings of the National Academy of Sciences*. 2015;112:  
510 13805–13810. doi:10.1073/pnas.1509591112



- 511 36. Hawley PH, Little TD, Card NA. The myth of the alpha male: A new look at  
512 dominance-related beliefs and behaviors among adolescent males and females. *Int J*  
513 *Behav Dev.* 2008;32(1):76–88. <https://doi.org/10.1177/0165025407084054>.
- 514 37. Stanford CB. The Social Behavior of Chimpanzees and Bonobos: Empirical Evidence  
515 and Shifting Assumptions. *Current Anthropology.* 1998;39: 399–420.  
516 doi:10.1086/204757
- 517 38. Carter CS. Neuroendocrine Perspectives On Social Attachment And Love.  
518 *Psychoneuroendocrinology.* 1998;23: 779–818. doi:10.1016/s0306-4530(98)00055-9
- 519 39. Bartz JA, Hollander E. The neuroscience of affiliation: Forging links between basic  
520 and clinical research on neuropeptides and social behavior. *Hormones and Behavior.*  
521 2006;50: 518–528. doi:10.1016/j.yhbeh.2006.06.018
- 522 40. Sumra MK (2019) Masculinity, femininity, and leadership: Taking a closer look at  
523 the alpha female. *PLoS ONE* 14(4): e0215181. <https://doi.org/10.1371/journal.pone.0215181>
- 525 41. Campbell A. Attachment, aggression and affiliation: The role of oxytocin in female  
526 social behavior. *Biological Psychology.* 2008;77: 1–10.  
527 doi:10.1016/j.biopsycho.2007.09.001
- 528 42. Gladue BA. Aggressive behavioral characteristics, hormones, and sexual orientation  
529 in men and women. *Aggressive Behavior.* 1991;17: 313–326. doi:10.1002/1098-  
530 2337(1991)17:6<313::aid-ab2480170603>3.0.co;2-z
- 531 43. Sapolsky RM. The Influence of Social Hierarchy on Primate Health. *Science.*  
532 2005;308: 648–652. doi:10.1126/science.1106477
- 533 44. Beehner JC, Bergman TJ. The next step for stress research in primates: To identify  
534 relationships between glucocorticoid secretion and fitness. *Hormones and Behavior.*  
535 2017;91: 68–83. doi:10.1016/j.yhbeh.2017.03.003
- 536 45. Udry JR. Biological Predispositions and Social Control in Adolescent Sexual  
537 Behavior. *American Sociological Review.* 1988;53: 709. doi:10.2307/2095817
- 538 46. Wu MV, Manoli DS, Fraser EJ, Coats JK, Tollkuhn J, Honda S, et al. Estrogen  
539 masculinizes neural pathways and sex-specific behaviors. *Cell.* 2009;139: 61–72. doi:  
540 doi: 10.1016
- 541 47. Bem SL. The measurement of psychological androgyny. *J Consult Clin Psychol.* 1974  
542 Apr;42(2):155–62. [doi.org/10.1037/h0036215](https://doi.org/10.1037/h0036215) PMID:4823550.
- 543 48. Carver LF, Vafaei A, Guerra R, Freire A, Phillips SP. Gender differences:  
544 examination of the 12-item bem sex role inventory (BSRI-12) in an older Brazilian

- 545 population. PLoS One. 2013 Oct;8(10):e76356.  
546 <https://doi.org/10.1371/journal.pone.0076356> PMID:24098482.
- 547 49. Ward RM, Popson HC, DiPaolo D. Defining the alpha female: A female leadership  
548 measure. *J Leadersh Organ Stud*. 2010;17(3):309–20.  
549 <https://doi.org/10.1177/1548051810368681>.
- 550 50. Rosenberg M. *Society and the adolescent self-image*. Princeton (NJ): Princeton  
551 University Press; 1965. <https://doi.org/10.1515/9781400876136>.
- 552 51. Blascovich J, Tomaka J. Measures of self-esteem. In: Robinson JP, Shaver PR,  
553 editors. *Measures of personality and social psychological attitudes*. San Diego (CA):  
554 Academic Press; 1991. pp. 115–60. [https://doi.org/10.1016/B978-0-12-590241-](https://doi.org/10.1016/B978-0-12-590241-0.50008-3)  
555 [0.50008-3](https://doi.org/10.1016/B978-0-12-590241-0.50008-3).
- 556 52. Schmitt DP and Allik J. Simultaneous administration of the Rosenberg Self-Esteem  
557 Scale in 53 nations: Exploring the universal and culture-specific features of global  
558 self-esteem. *J Pers Social Psychol*. 2005;89(4):623–42.
- 559 53. Gleixner A, Meyer HHD. Detection of estradiol and testosterone in hair of cattle by  
560 HPL/EIA. *Fresenius Journal of Analytical Chemistry*. 1997;357: 1198–1201.  
561 doi:10.1007/s002160050330
- 562 54. Yang HZ, Lan J, Meng YJ, Wan XJ, Han DW. A preliminary study of steroid  
563 reproductive hormones in human hair. *The Journal of Steroid Biochemistry and*  
564 *Molecular Biology*. 1998;67: 447–450. doi:10.1016/s0960-0760(98)00120-4
- 565 55. Sauvé B, Koren G, Walsh G, Tokmakejian S, Uum SHV. Measurement of cortisol in  
566 human Hair as a biomarker of systemic exposure. *Clinical & Investigative Medicine*.  
567 2007;30: 183. doi:10.25011/cim.v30i5.2894
- 568 56. Gow R, Thomson S, Rieder M, Uum SV, Koren G. An assessment of cortisol analysis  
569 in hair and its clinical applications. *Forensic Science International*. 2010;196: 32–37.  
570 doi:10.1016/j.forsciint.2009.12.040
- 571 57. Stalder T, Kirschbaum C. Analysis of cortisol in hair – State of the art and future  
572 directions. *Brain, Behavior, and Immunity*. 2012;26: 1019–1029.  
573 doi:10.1016/j.bbi.2012.02.002
- 574 58. Holland BJV, Frings-Dresen MHW, Sluiter JK. Measuring short-term and long-term  
575 physiological stress effects by cortisol reactivity in saliva and hair. *International*  
576 *Archives of Occupational and Environmental Health*. 2011;85: 849–852.  
577 doi:10.1007/s00420-011-0727-3
- 578 59. Uum SHMV, Sauvé B, Fraser LA, Morley-Forster P, Paul TL, Koren G. Elevated  
579 content of cortisol in hair of patients with severe chronic pain: A novel biomarker for  
580 stress. *Stress*. 2008;11: 483–488. doi:10.1080/10253890801887388

- 581 60. Slezak JK, Ström JO, Theodorsson E. Testosterone-like immunoreactivity in hair  
582 measured in minute sample amounts - a competitive radioimmunoassay with an  
583 adequate limit of detection. *Scientific Reports*. 2017;7. doi:10.1038/s41598-017-  
584 17930-w
- 585 61. Genuth SM. *The Adrenal Glands*, 949-979. St. Louis, MO: Moseby Year Book;  
586 1993.
- 587 62. Manenschijn L, Schaap L, Schoor NMV, Pas SVD, Peeters GMEE, Lips P, et al.  
588 High Long-Term Cortisol Levels, Measured in Scalp Hair, Are Associated With a  
589 History of Cardiovascular Disease. *The Journal of Clinical Endocrinology &*  
590 *Metabolism*. 2013;98: 2078–2083. doi:10.1210/jc.2012-3663
- 591 63. Hintze J. *NCSS and PASS Number crunches statistical systems*. Utah: Kaysville;  
592 2004.
- 593 64. Carré JM, Archer J. Testosterone and human behavior: the role of individual and  
594 contextual variables. *Current Opinion in Psychology*. 2018;19: 149–153.  
595 doi:10.1016/j.copsyc.2017.03.021
- 596 65. Sapolsky RM, Ray JC. Styles of dominance and their endocrine correlates among  
597 wild olive baboons (*Papio anubis*). *American Journal of Primatology*. 1989;18: 1–13.  
598 doi:10.1002/ajp.1350180102
- 599 66. Baucom DH. Independent CPI Masculinity and Femininity Scales: Psychological  
600 Correlates and a Sex-Role Typology. *Journal of Personality Assessment*. 1980;44:  
601 262–271. doi:10.1207/s15327752jpa4403\_8
- 602 67. Abdelal R, Herrera YM, Johnston AI, McDermott R. editors. *Measuring Identity – A*  
603 *guide for social scientists*. New York (NY): Cambridge University Press; 2009.  
604 <https://doi.org/10.1017/CBO9780511810909>.
- 605 68. Eisenegger C, Haushofer J, Fehr E. The role of testosterone in social interaction.  
606 *Trends in Cognitive Sciences*. 2011;15: 263–271. doi:10.1016/j.tics.2011.04.008
- 607 69. Hamel AF. Interactions between Hypothalamic-Pituitary-Adrenal (HPA) Axis,  
608 oxytocin system, and behavior in differently reared rhesus monkeys (*Macaca*  
609 *mulatta*). [https://scholarworks.umass.edu/dissertations\\_2/362](https://scholarworks.umass.edu/dissertations_2/362). 2015.

610

611

612

613 **Supporting Information**

614 **S1 File. Rosenberg Self Esteem Scale.**

615

616 **S2 File. BSRI-M and BSRI-F.**

617

618 **S3 File. Alpha Female Sexuality Profile.**

619

620 **S4 File. Alpha Female Inventory (AFI).**

621

622

623

WITHDRAWN  
see manuscript DOI for details
